# Supplementary material
Source: Springer Nature journal article supplement (https://www.springermedizin.de/resource/supplementary/12245_2010_68_MOESM2_ESM.pdf/9672706)
Supplement: MOESM2 [file 9672706]

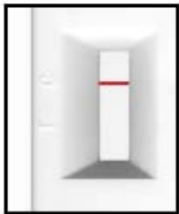

Infarction not likely  
or outside the  
diagnostic window

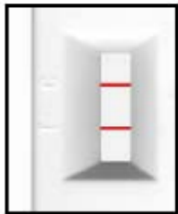

Infarction likely

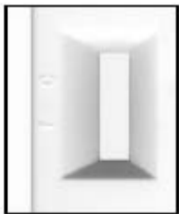

Invalid result  
Perform a new  
test

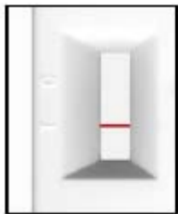

Invalid result  
Perform a new  
test
